# Supplementary material
Source: publisher site journal article supplement (https://www.dovepress.com/article/325467)
Supplement: Supplementary file 1 [file get_supplementary_file.php]

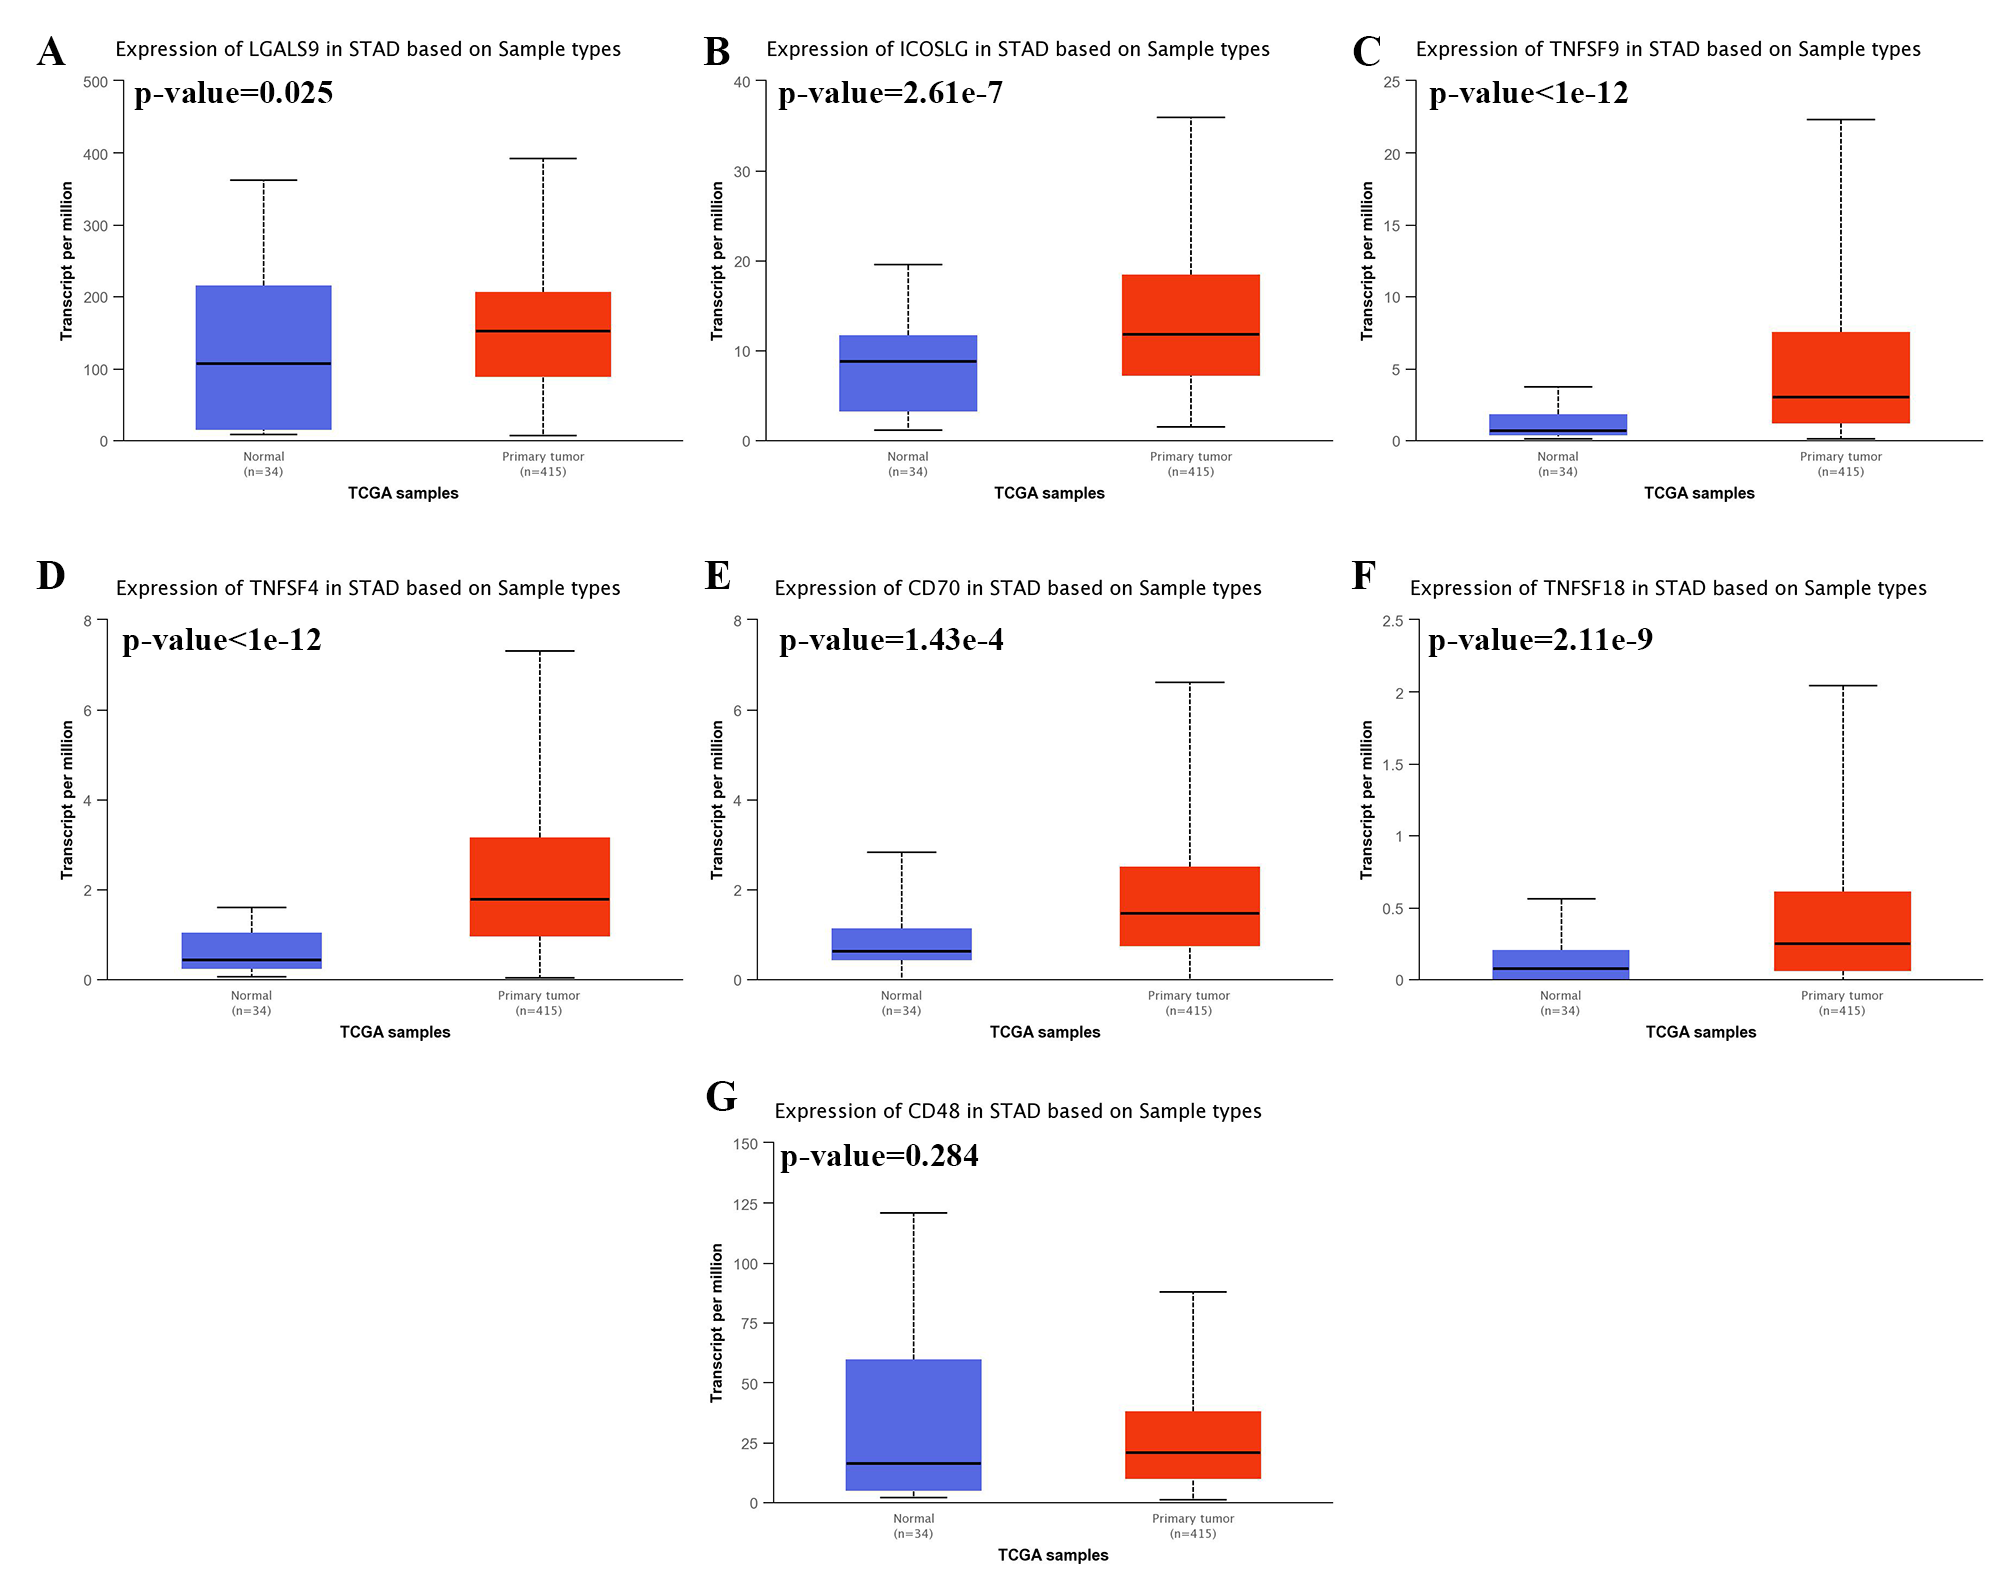


**Supplementary Figure 1.** The mRNA level of immune checkpoints in STAD. Box plots derived from TCGA STAD dataset comparing the expression of LGALS9 (A), ICOSLG (B), TNFSF9 (C), TNFSF4 (D), CD70 (E), TNFSF18 (F) and CD48 (G) in STAD tissue and normal tissues.

**Supplementary Table 1. The primers for qRT-PCR in the current study**

| **Gene** | **Primers** |
| --- | --- |
| GAPDH  CD70  ICOSLG | Forward: GCACCGTCAAGGCTGAGAAC  Reverse: TGGTGAAGACGCCAGTGGA  Forward: CGTCCCACCCAAGTGACTC  Reverse: GCTTTGGTCCCATTGGTCG  Forward: TGGAAGAGGTGGTCAGGC  Reverse: TTAGGCTATTGTCCGTTG |
